# Supplementary material
Source: PubMed Central journal article supplement (PMC3534766)

## Supplementary Materials

**Supplementary Table S1.** Structural statistics for the family of 20 structures of FUS-RRM in aqueous solution.

|                                                         |                      |
|---------------------------------------------------------|----------------------|
| Distance restraints                                     |                      |
| Intraresidue ( $i-j=0$ )                                | 719                  |
| Sequential ( $ i-j =1$ )                                | 425                  |
| Medium range ( $2 \leq  i-j  \leq 4$ )                  | 186                  |
| Long range ( $ i-j  \geq 5$ )                           | 328                  |
| Hydrogen bonds                                          | 18                   |
| Total                                                   | 1676                 |
| Dihedral angle restraints                               |                      |
| $\Phi$                                                  | 47                   |
| $\Psi$                                                  | 47                   |
| Total                                                   | 94                   |
| Mean r.m.s. deviations from the experimental restraints |                      |
| Distance ( $\text{\AA}$ )                               | 0.0185 $\pm$ 0.0012  |
| Dihedral angle ( $^\circ$ )                             | 0.2265 $\pm$ 0.0479  |
| Mean r.m.s. deviations from idealized covalent geometry |                      |
| Bond ( $\text{\AA}$ )                                   | 0.0020 $\pm$ 0.00012 |
| Angle ( $^\circ$ )                                      | 0.3653 $\pm$ 0.0166  |
| Improper ( $^\circ$ )                                   | 0.2407 $\pm$ 0.0206  |
| Mean energies ( $\text{kcal mol}^{-1}$ ) <sup>a</sup>   |                      |
| $E_{\text{NOE}}$                                        | 28.85 $\pm$ 3.85     |
| $E_{\text{cdih}}$                                       | 0.31 $\pm$ 0.13      |
| $E_{\text{L-J}}$                                        | -189.01 $\pm$ 24.74  |
| Ramachandran plot <sup>b</sup>                          |                      |
| Residues 286-292, 295-327 and 336-368 in FUS-RRM        |                      |
| % residues in the most favorable regions                | 80.4                 |
| additional allowed regions                              | 17.5                 |
| generously allowed regions                              | 1.5                  |
| Atomic r.m.s. differences ( $\text{\AA}$ )              |                      |
| Residues 286-292, 295-327 and 336-368 in FUS-RRM        |                      |
| Backbone heavy atoms (N, C $\alpha$ , and C')           | 0.454                |
| Heavy atoms                                             | 0.922                |

---

None of the structures exhibits distance violations greater than 0.3  $\text{\AA}$  or dihedral angle violations greater than 4 $^\circ$ .

<sup>a</sup>The final values of the square-well NOE and dihedral angle potentials were calculated with force constants of 50  $\text{kcal mol}^{-1}\text{\AA}^{-1}$  and 200  $\text{kcal mol}^{-1}\text{rad}^{-1}$ .

<sup>b</sup>The program PROCHECK ([http://www.biochem.ucl.ac.uk/~roman/procheck\\_nmr/procheck\\_nmr.html](http://www.biochem.ucl.ac.uk/~roman/procheck_nmr/procheck_nmr.html)) was used to assess the overall quality of the structures.

**Figure S1. The FUS-RRM domain is distinct from other hnRNP RRM domains.**

(A) Ribbon diagram of a classical RRM structure showing the typical  $\beta 1\alpha 1\beta 2\beta 3\alpha 2\beta 4$  RRM-fold. (B) Structure-based sequence alignment of the RRM domains generated by Dali Server ([http://ekhidna.biocenter.helsinki.fi/dali\\_server](http://ekhidna.biocenter.helsinki.fi/dali_server)). The secondary structures of the FUS-RRM domain are marked on the top. The RNP1 and RNP2 regions are highlighted with red boxes with the consensus sequences shown at the bottom. The extra long L2 loop is highlighted with a black box. Telomeric DNA binding sites of hnRNP A1 RRM1 are enclosed in small red box, and the corresponding residues of hnRNP D1 BD2 and FUS-RRM are enclosed in green box.

**Figure S2. The  $^1\text{H}$ - $^{15}\text{N}$  HSQC spectrum of the FUS-RRM domain.** The spectrum showed good peak dispersion and peak intensity. Each peak in the spectrum was labeled with residue number and the much crowded areas in the middle were enlarged.

**Figure S3. Chemical shift perturbations in FUS-RRM upon titration with different nucleic acids.** (A-D) Overlay plots of the  $^1\text{H}$ - $^{15}\text{N}$  HSQC spectra of the FUS-RRM domain and that of the domain titrated with RNA (UAGUUUGGUGAU) (A), 6-mer DNA (d(TTAGGG)) (B), 24-mer DNA (d(TTAGGG)<sub>4</sub>) (C) and ds-DNA (d(TTAGGG/CCCTAA)<sub>4</sub>) (D). The peaks with significant chemical shift changes are marked and the changes are highlighted by green arrows.

**Figure S4. Comparison of the nucleic acid binding interfaces between FUS-RRM and BD2 of hnRNP D.** The structures of FUS-RRM (A-B) and the BD2 domain of hnRNP D (C-D) are shown in the ribbon diagrams. The residues responsible for binding to nucleic acids were determined from NMR chemical shift perturbations and are highlighted in red. (A) FUS-RRM and 6-mer DNA d(TTAGGG)<sub>4</sub>; (B) FUS-RRM and RNA UAGUUUGGUGAU; (C) BD2 of hnRNP D and 6-mer DNA d(TTAGGG); (D) BD2 of hnRNP D and RNA UUAGGG.

**Figure S5. The conformations of the nucleic acids.** (A) Overlay CD spectra of the 6-mer, 24-mer and ds-DNA. Each DNA sample gives a distinct CD characteristic of single-stranded, quadruplex and double-stranded DNA, respectively. (B) The CD spectra of 24-mer DNA upon addition of different amounts of protein. (C) The CD spectra of ds-DNA upon addition of different amounts of protein. (B) and (C) support that the conformation of nucleic acids remained largely unchanged upon addition of FUS-RRM.

**Figure S6. Curve fitting of the chemical shift changes upon binding to nucleic acid at different concentrations.** The dissociation constants of the FUS-RRM interaction with RNA (A, UAGUUUGGUGAU), 6-mer DNA (B, d(TTAGGG)) and dsDNA (C, d(TTAGGG/CCCTAA)<sub>4</sub>) for selected residues are calculated by curve fitting the function describe in material and method section and the results are shown on the right. The selected residues are in different contacting clusters of the RRM

domain and their residue numbers are labeled in the black box of each panel.

**Figure S7. The concentration response curve of FUS-RRM binding to various forms of nucleic acids.** The nucleic acids used in the surface plasmon resonance (SPR) experiments were: RNA, UAGUUUGGUGAU; 6-mer DNA, d(TTAGGG); 24-mer DNA, d(TTAGGG)<sub>4</sub> and ds-DNA d(TTAGGG/CCCTAA)<sub>4</sub>. The stoichiometry of FUS-RRM binding to nucleic acids was estimated in the SPR experiments. The FUS-RRM bound to RNA and 6-mer DNA with an approximate 1:1 ratio whereas the ratio of FUS-RRM to the G-quadruplex and ds-DNA was approximately 2:1 and 3.5:1, respectively.

**Figure S8. Site-directed mutation has minimal effects on the overall structure of the FUS-RRM domain.** An overlay plot of the <sup>1</sup>H-<sup>15</sup>N HSQC spectra of the wild-type FUS-RRM domain (black), K312A/K315A/K316A (red). The NMR spectra were nearly identical with virtually no significant chemical shift changes expect for the “KK” loop region and close neighbors, demonstrating that the mutations do not change the global 3D structure of the FUS-RRM domain.



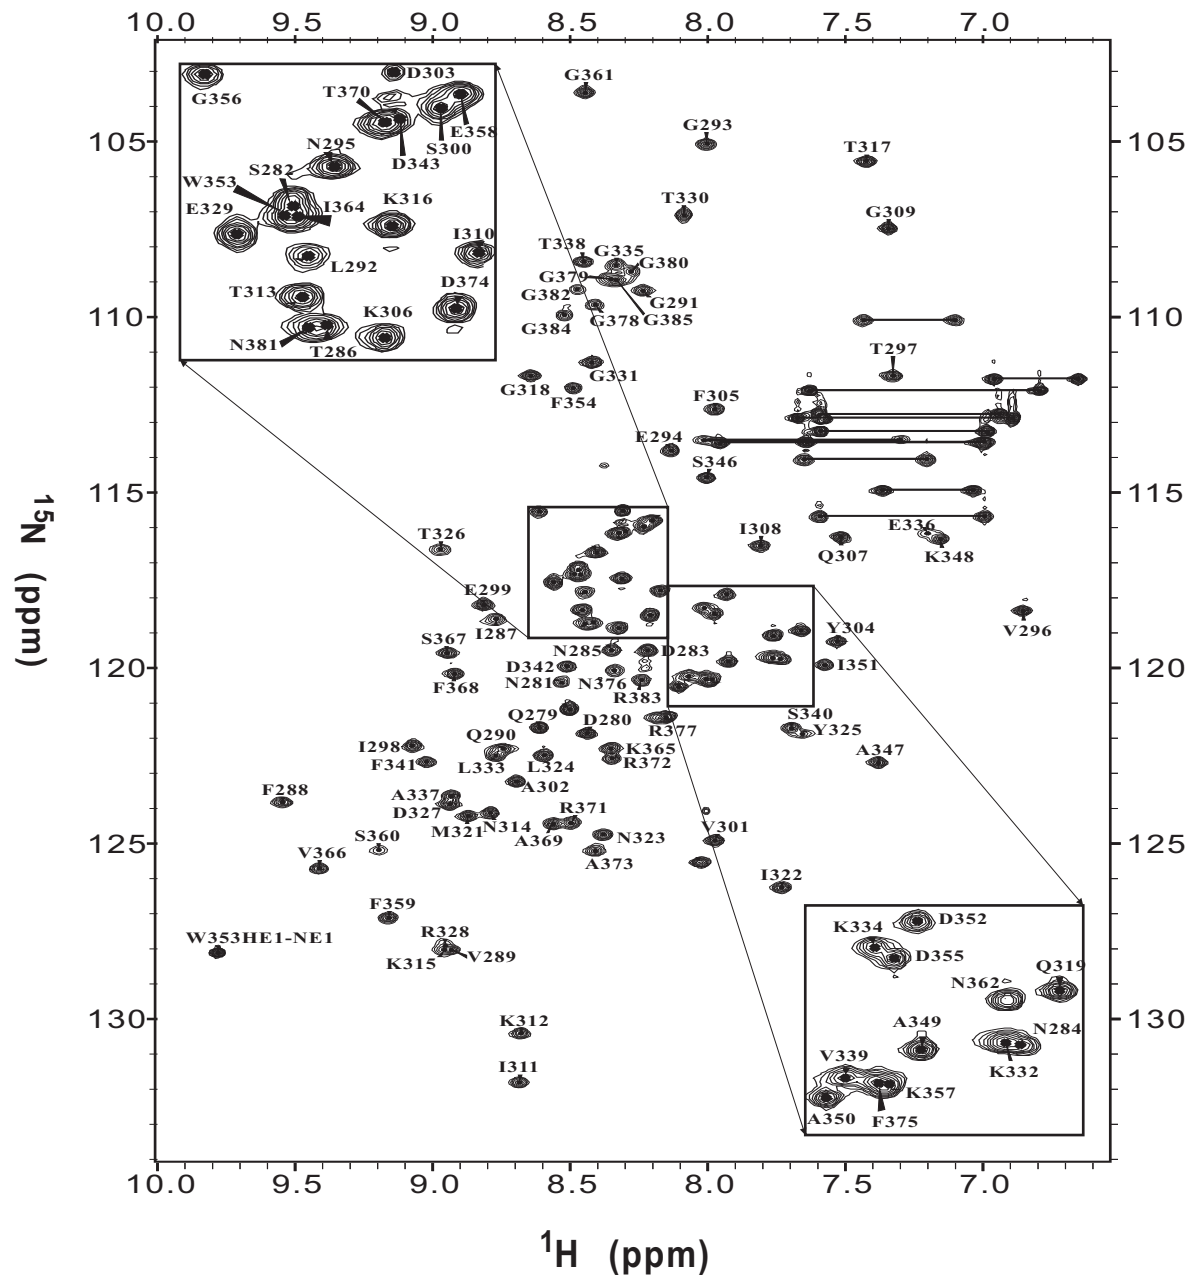

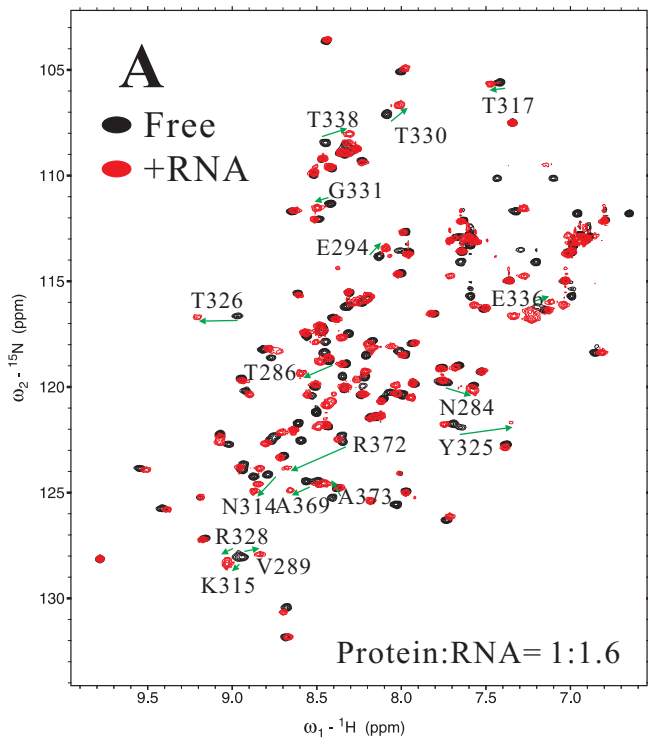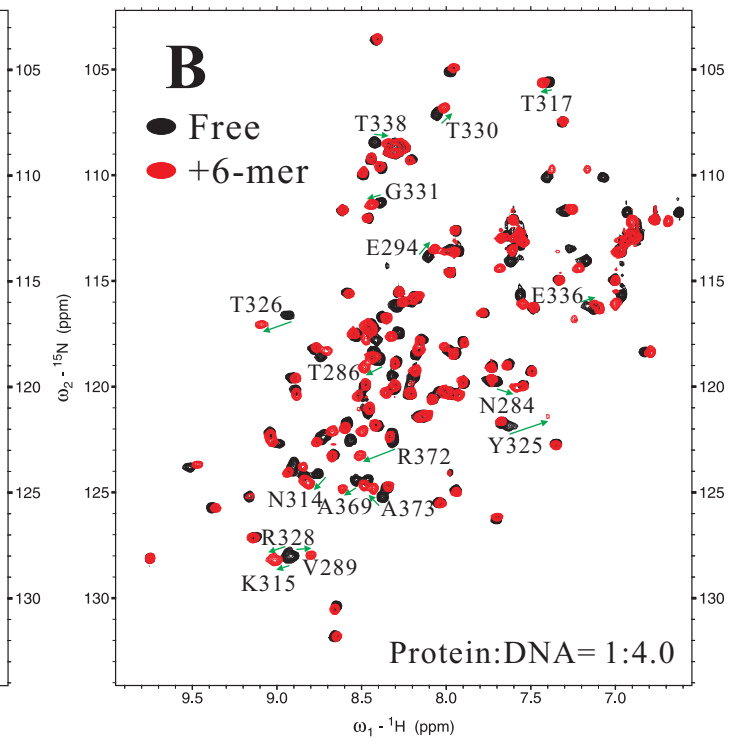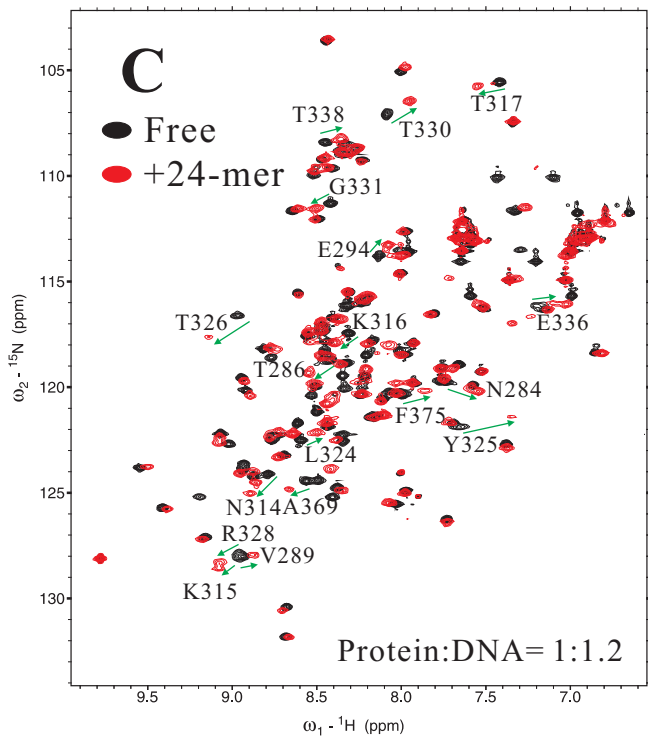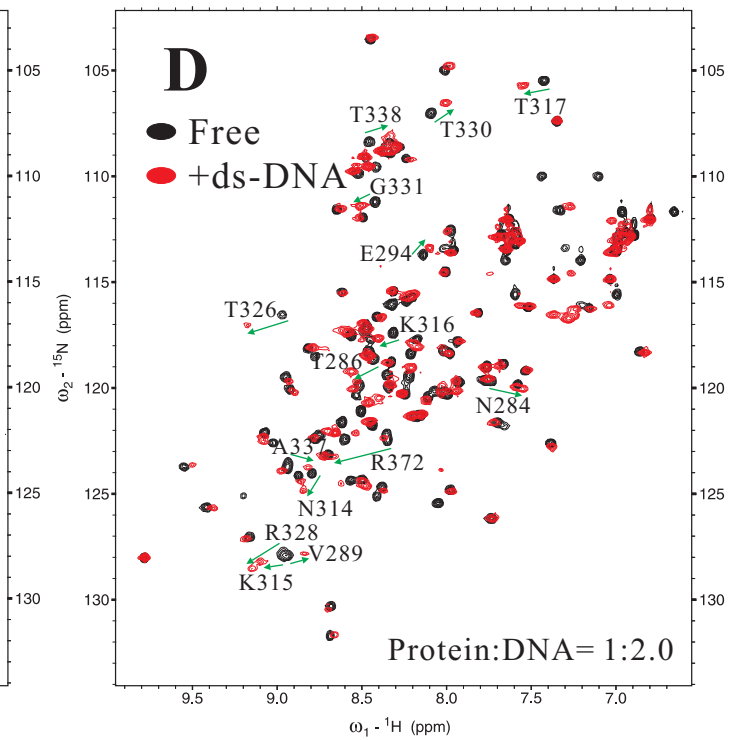

**A**

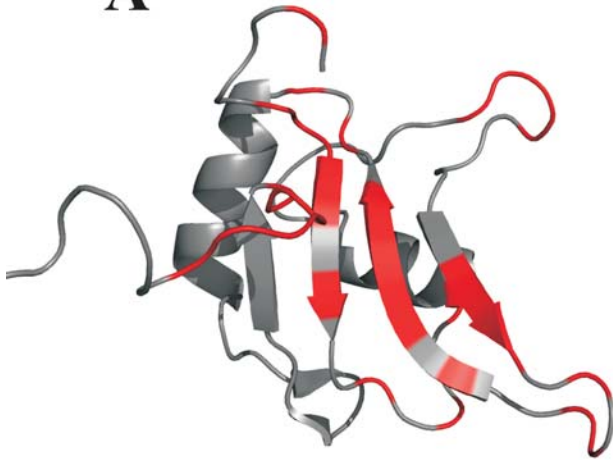

with DNA

**B**

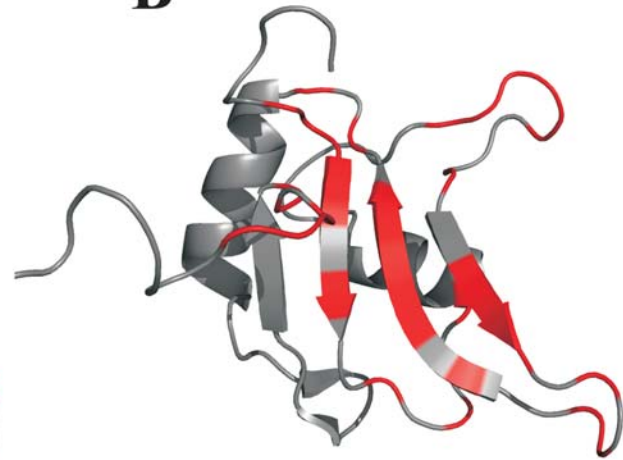

with RNA

**FUS-RRM**

**C**

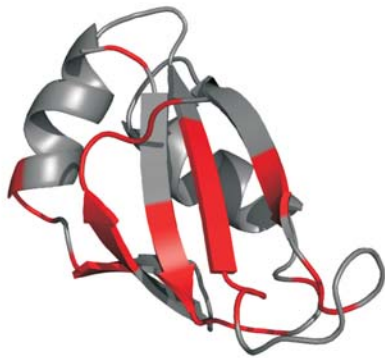

with DNA

**D**

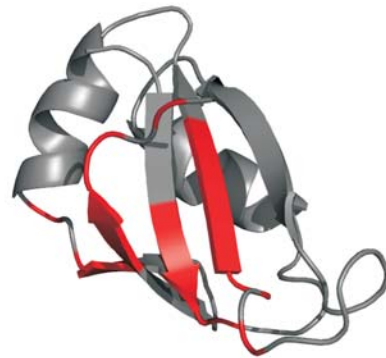

with RNA

**BD2 of hnRNP D**

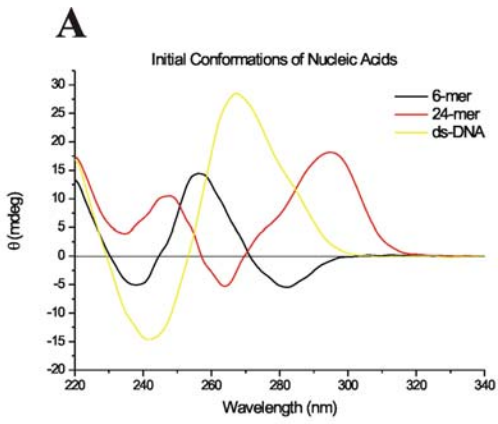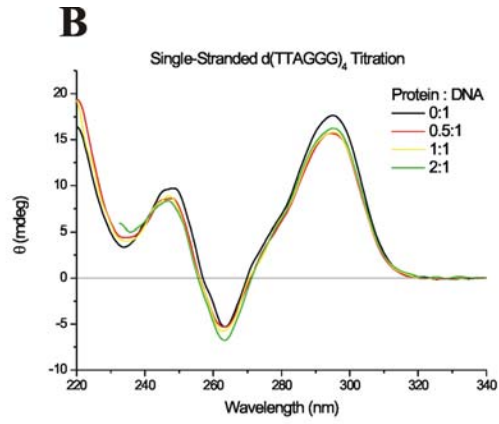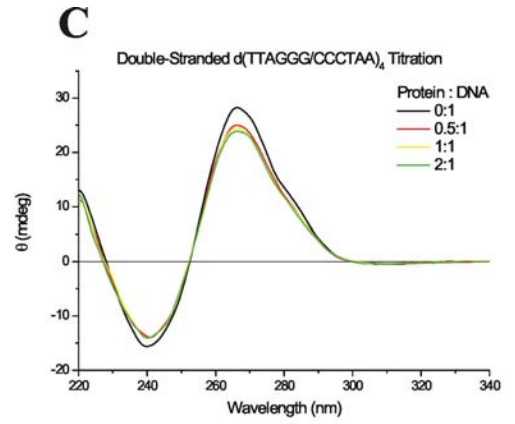



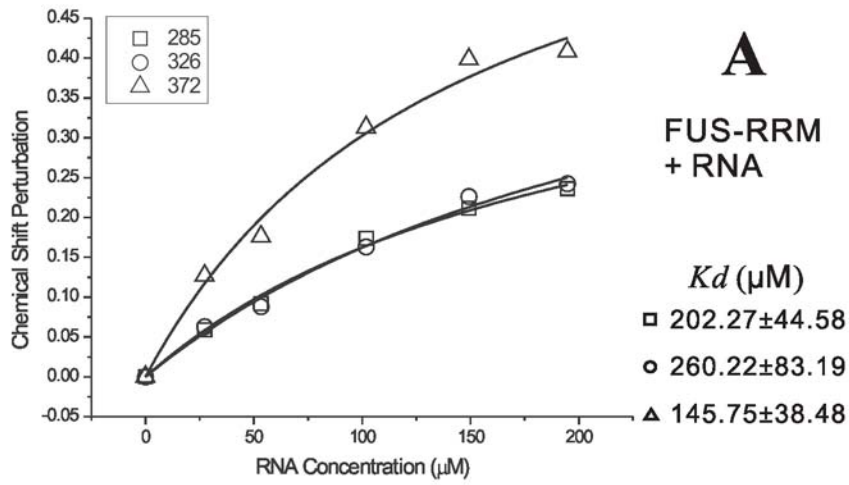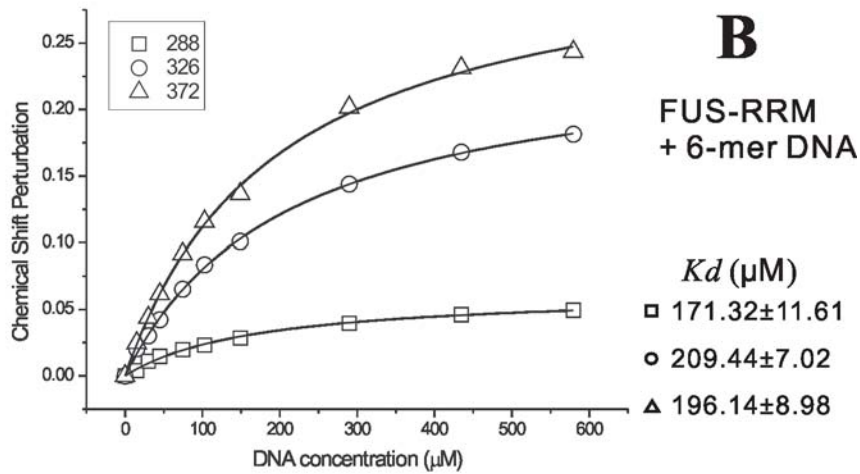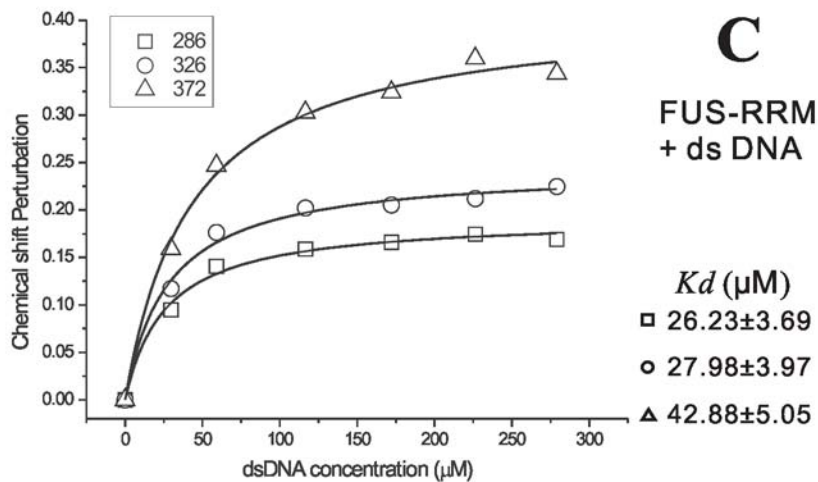

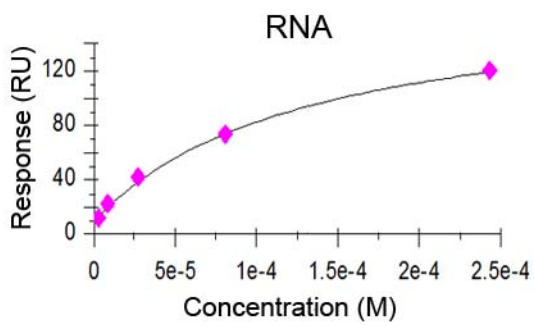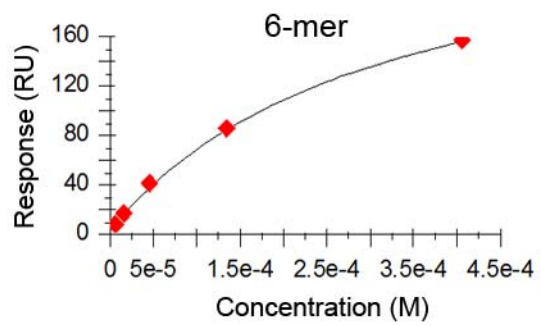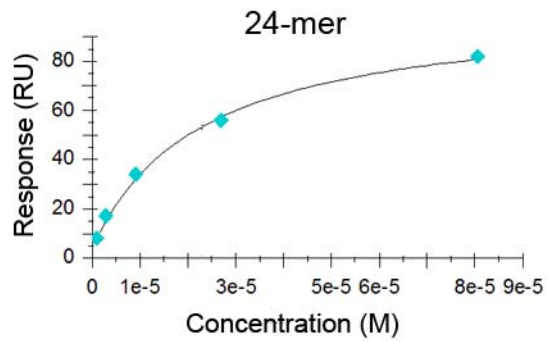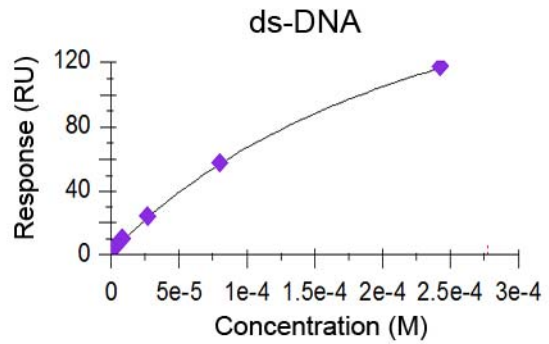

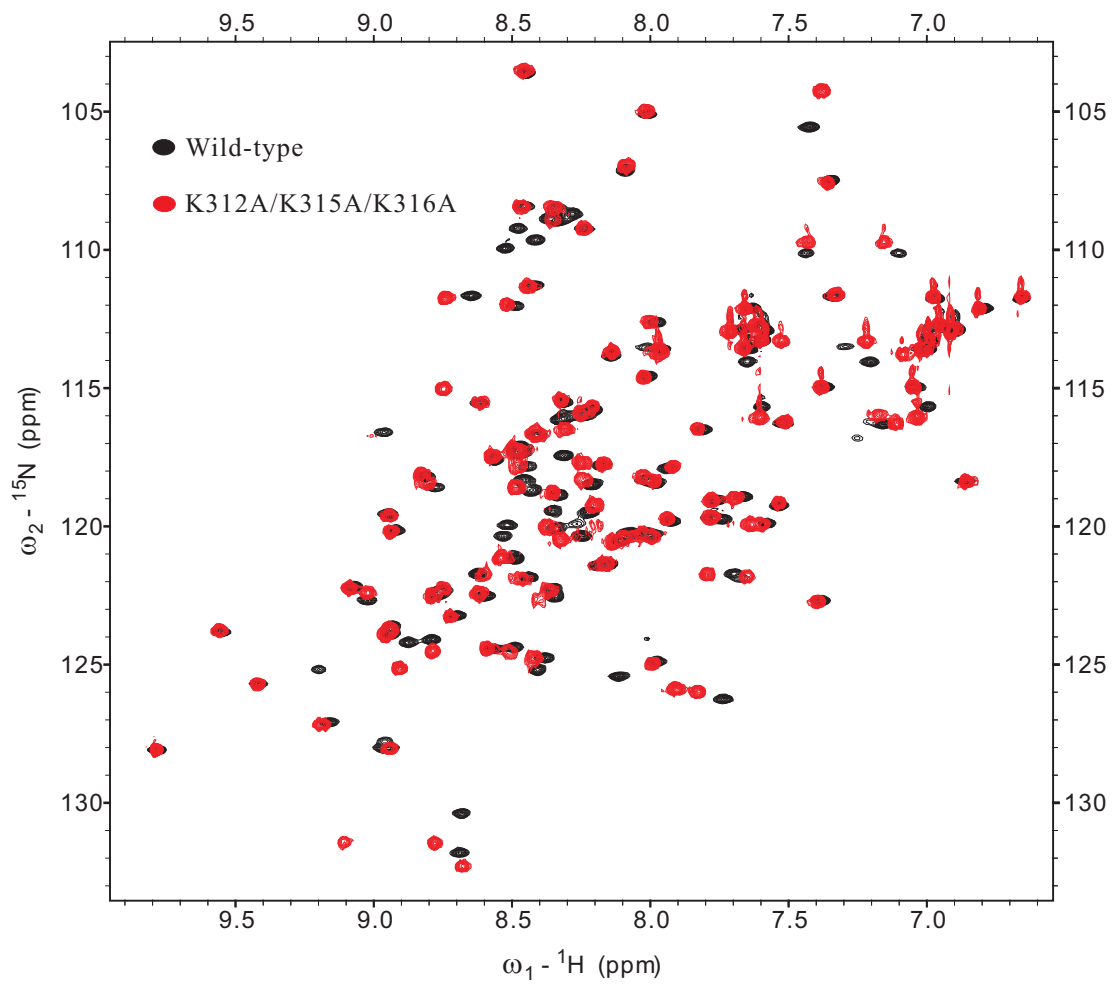

Supplement: NIHMS425123-supplement-01.pdf [file NIHMS425123-supplement-01.pdf]
